# Supplementary material for: Effects of Probiotic Supplementation on Exercise with Predominance of Aerobic Metabolism in Trained Population: A Systematic Review, Meta-Analysis and Meta-Regression
Source: Nutrients. 2022 Jan 30;14(3):622. doi: 10.3390/nu14030622 (PMC8840281; doi:10.3390/nu14030622)
Supplement: Supplementary file 1 [file nutrients-14-00622-s001.zip › Supplementary file 1.pdf]

**Table S1:** Code lines for search in each database

|                                                                                                                                                                                                                                                                                                                                                                                                              |
|--------------------------------------------------------------------------------------------------------------------------------------------------------------------------------------------------------------------------------------------------------------------------------------------------------------------------------------------------------------------------------------------------------------|
| <u>PubMed/MEDLINE database:</u><br>("probiotics"[MeSH Terms] OR "probiotics"[All Fields]) AND (("exercise"[MeSH Terms] OR "exercise"[All Fields]) OR ("sports"[MeSH Terms] OR "sports"[All Fields] OR "sport"[All Fields]) OR performance[All Fields] OR aerobic[All Fields]) AND (("athletes"[MeSH Terms] OR "athletes"[All Fields] OR "athlete"[All Fields]) OR trained[All Fields] OR elite[All Fields]). |
| <u>WOS database:</u><br>(Probiotics and (exercise or sport or performance or aerobic) and (athlete or trained or elite)).                                                                                                                                                                                                                                                                                    |
| <u>Scopus database:</u><br>(Probiotics and (exercise or sport or performance or aerobic) and (athlete or trained or elite)).                                                                                                                                                                                                                                                                                 |
