# Supplementary material for: Effects of Probiotic Supplementation on Exercise with Predominance of Aerobic Metabolism in Trained Population: A Systematic Review, Meta-Analysis and Meta-Regression
Source: Nutrients. 2022 Jan 30;14(3):622. doi: 10.3390/nu14030622 (PMC8840281; doi:10.3390/nu14030622)
Supplement: Supplementary file 1 [file nutrients-14-00622-s001.zip › Supplementary file 2.pdf]

**Table S2:** The reason of excluded articles

| Article                                                                                                                                                                                                 | Reason for exclusion          |
|---------------------------------------------------------------------------------------------------------------------------------------------------------------------------------------------------------|-------------------------------|
| Effects of <i>Lactobacillus plantarum</i> TWK10 on Exercise Physiological Adaptation, Performance, and Body Composition in Healthy Humans                                                               | Not highly trained population |
| The effects of postexercise consumption of a kefir beverage on performance and recovery during intensive endurance training                                                                             | Not highly trained population |
| <i>Bifidobacterium animalis</i> subsp. <i>lactis</i> BB-12 Improves the State Anxiety and Sports Performance of Young Divers Under Stress Situations: A Single-Arm, Prospective Proof-of-Concept Study. | Not highly trained population |
| Probiotic <i>Bacillus coagulans</i> GBI-30, 6086 reduces exercise-induced muscle damage and increases recovery                                                                                          | Not highly trained population |
| The effects of combined probiotic ingestion and circuit training on muscular strength and power and cytokine responses in young males                                                                   | Not highly trained population |
| The Effects of Plasmacytoid Dendritic Cell-Stimulative Lactic Acid Bacteria, <i>Lactococcus lactis</i> Strain Plasma, on Exercise-Induced Fatigue and Recovery via Immunomodulatory Action              | Not performance measure       |
| Effect of a probiotic intake on oxidant and antioxidant parameters in plasma of athletes during intense exercise training                                                                               | Not performance measure       |
| Probiotic supplementation elicits favourable changes in muscle soreness and sleep quality in rugby players.                                                                                             | Not performance measure       |
| Effects of Daily Probiotics Supplementation on Anxiety Induced Physiological Parameters among Competitive Football Players                                                                              | Not performance measure       |
| The <i>Bifidobacterium bifidum</i> (BIB2) Probiotic Increased Immune System Factors in Men Sprint Athletes                                                                                              | Not performance measure       |
| Efficacy of heat-killed <i>Lactococcus lactis</i> JCM 5805 on immunity and fatigue during consecutive high intensity exercise in male athletes: a randomized, placebo-controlled, double-blinded trial  | Not performance measure       |
| The Effects of Plasmacytoid Dendritic Cell-Stimulative Lactic Acid Bacteria, <i>Lactococcus</i>                                                                                                         | Not performance measure       |

|                                                                                                                                                                                  |                                |
|----------------------------------------------------------------------------------------------------------------------------------------------------------------------------------|--------------------------------|
| lactis Strain Plasma, on Exercise-Induced Fatigue and Recovery via Immunomodulatory Action.                                                                                      |                                |
| Effect of Multi-Strain Probiotic Supplementation on URTI Symptoms and Cytokine Production by Monocytes after a Marathon Race: A Randomized, Double-Blind, Placebo Study.         | Not performance measure        |
| Effects of Probiotic (Bacillus subtilis DE111) Supplementation on Immune Function, Hormonal Status, and Physical Performance in Division I Baseball Players                      | No aerobic performance measure |
| The Effect of 2 Weeks of Inactivated Probiotic Bacillus coagulans on Endocrine, Inflammatory, and Performance Responses During Self-Defense Training in Soldiers                 | No aerobic performance measure |
| Effects of Probiotic (Bacillus subtilis) Supplementation During Offseason Resistance Training in Female Division I Athletes                                                      | No aerobic performance measure |
| Probiotic Streptococcus thermophilus FP4 and Bifidobacterium breve BR03 Supplementation Attenuates Performance and Range-of-Motion Decrements Following Muscle Damaging Exercise | No aerobic performance measure |
